# Supplementary material for: Sustained signalling by PTH modulates IP3 accumulation and IP3 receptors through cyclic AMP junctions
Source: PubMed Central journal article supplement (PMC4294780; doi:10.1242/jcs.163071), 2015-01-15
Supplement: supp_128.2.408_JCS163071.pdf [file supp_128.2.408_JCS163071.pdf]

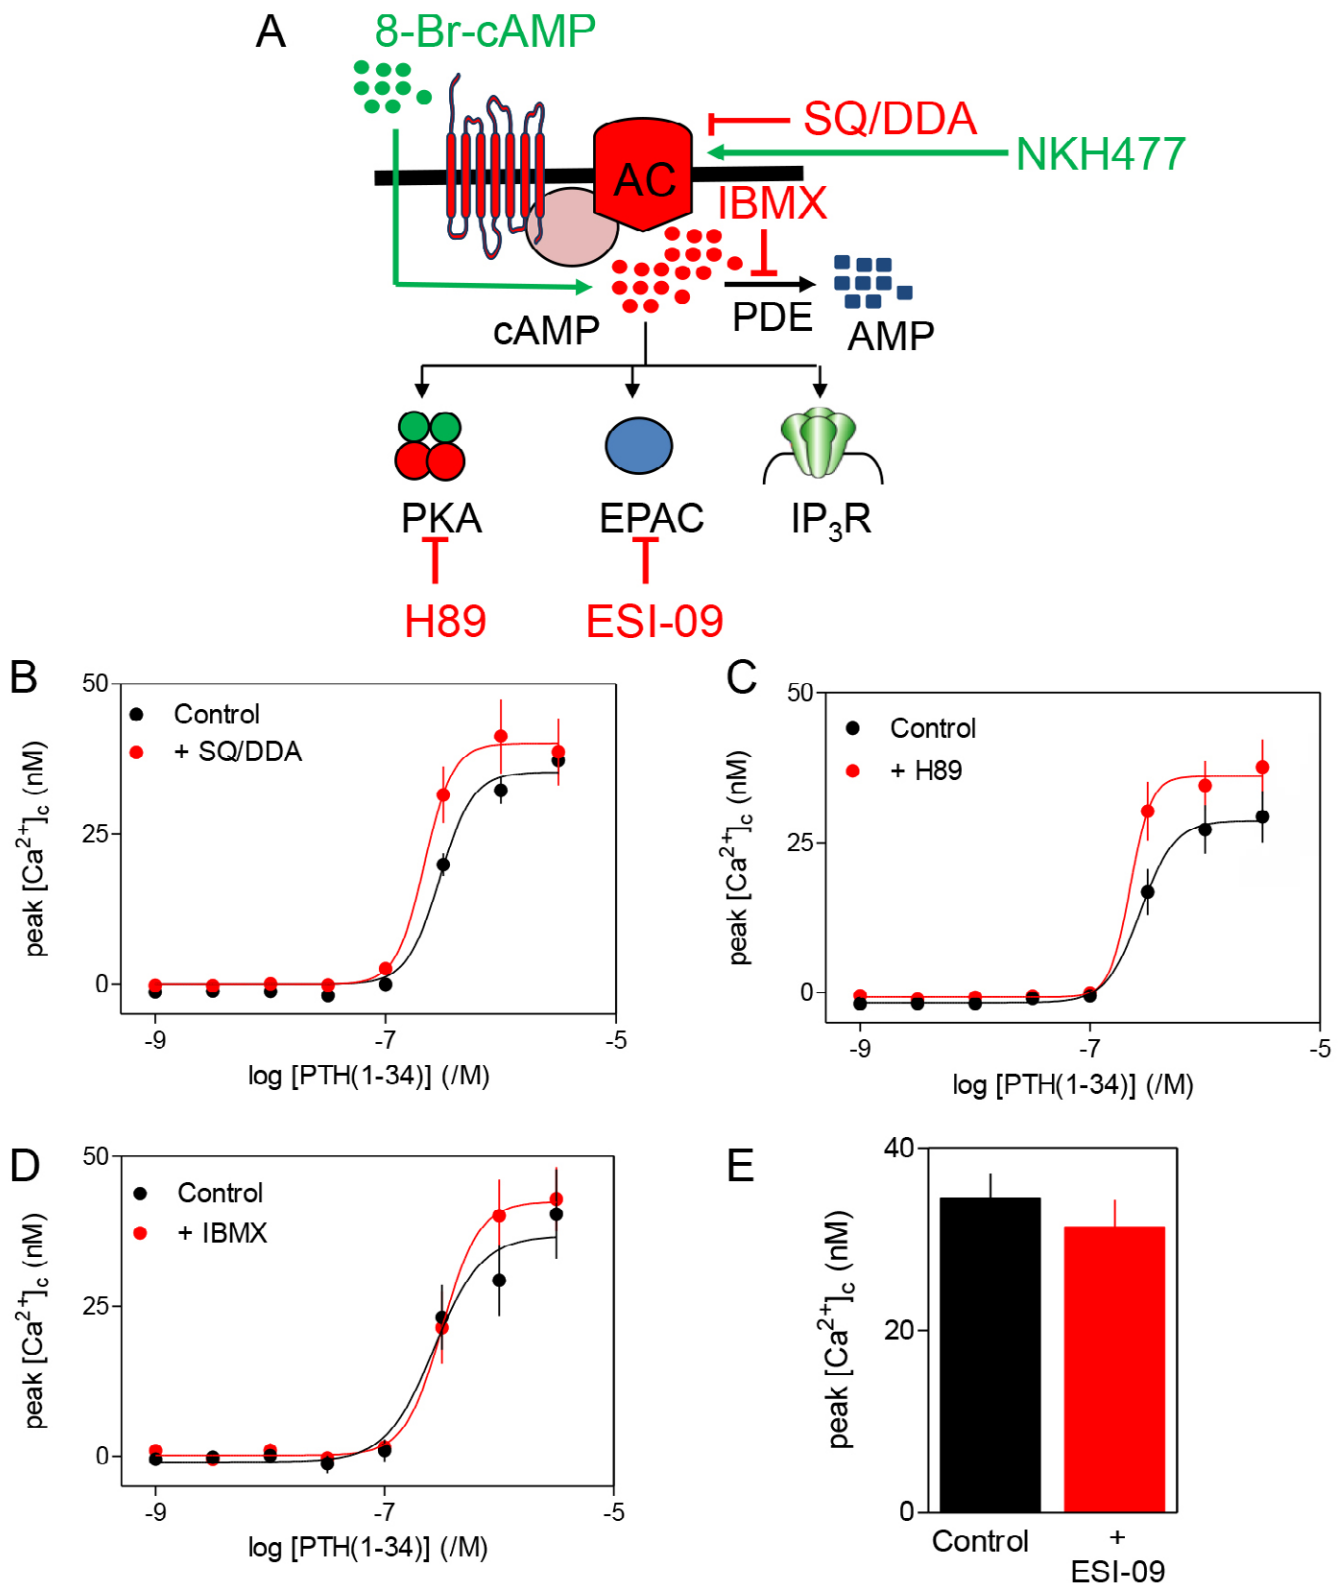

**Fig. S1. Ca<sup>2+</sup> signals evoked directly by high concentrations of PTH(1-34) are unaffected by inhibition of adenylyl cyclase, protein kinase A, cyclic nucleotide phosphodiesterases, or EPACs.** (A) Targets of the inhibitors used. Cyclic AMP produced by adenylyl cyclase (AC) can stimulate protein kinase A (PKA), exchange proteins activated by cAMP (EPACs) or IP<sub>3</sub> receptors (IP<sub>3</sub>R). DDA (2',5'-dideoxyadenosine) and SQ 22536 inhibit adenylyl cyclase, while NKH477 directly stimulates it. IBMX inhibits the phosphodiesterases (PDE) that degrade cAMP. H89 inhibits PKA. ESI-09 is an antagonist of EPACs. 8-Br-cAMP is a membrane-permeant analogue of cAMP. (B-D) Cells were incubated with SQ22536 (1 mM) and DDA (200 μM) (B, SQ/DDA, 20 min) to inhibit adenylyl cyclase, H89 (C, 10 μM, 20 min) to inhibit protein kinase A, or IBMX (D, 1 mM, 5 min) to inhibit cyclic nucleotide phosphodiesterases before addition of the indicated concentrations of PTH(1-34). Results show the peak increases in [Ca<sup>2+</sup>]<sub>c</sub> evoked by PTH(1-34). (E) Increases in [Ca<sup>2+</sup>]<sub>c</sub> evoked by 3 μM PTH(1-34) alone or with the antagonist of EPACs, ESI-09 (10 μM, 5 min). Results (B-E) are means ± s.e.m., n = 3.

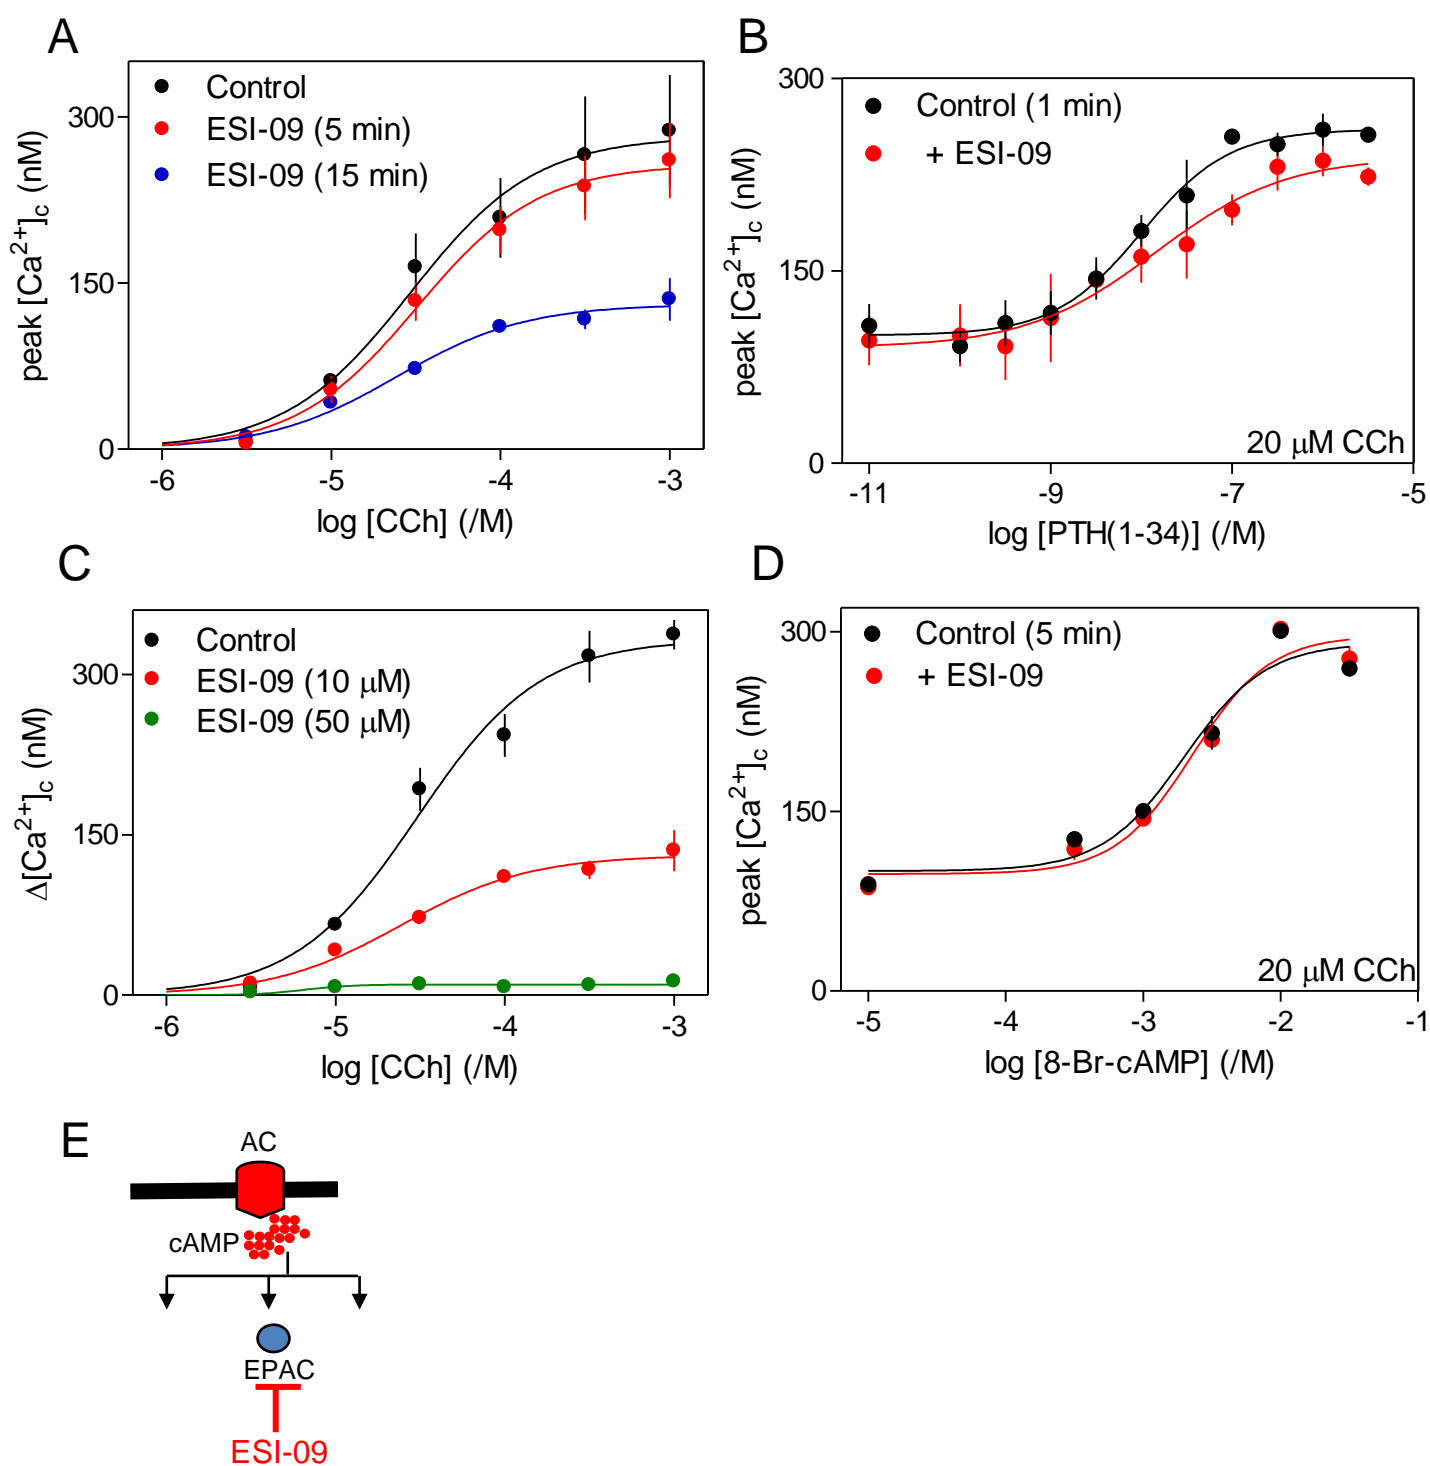

**Fig. S2. Exchange proteins activated by cAMP (EPACs) do not mediate the effects of PTH(1-34) on carbachol-evoked  $Ca^{2+}$  signals.** (A) HEK-PR1 cells were incubated with the EPAC antagonist, ESI-09 (10  $\mu$ M for 5 or 15 min), before addition of the indicated concentrations of carbachol (CCh) in  $Ca^{2+}$ -free HBS. Results show the peak increase in  $[Ca^{2+}]_c$  evoked by carbachol. (B) Similar analyses of cells treated with 10  $\mu$ M ESI-09 for 5 min, and then stimulated with carbachol (20  $\mu$ M) added 1 min after the indicated concentrations of PTH(1-34). (C) Experiments similar to those in A, show responses to carbachol after preincubation (15 min) with ESI-09 (0, 10 or 50  $\mu$ M). (D) Effects of ESI-09 (10  $\mu$ M, added 5 min before 8-Br-cAMP) on the  $Ca^{2+}$  signals evoked by carbachol after incubation with the indicated concentrations of the membrane-permeant analogue of cAMP, 8-Br-cAMP (5 min). Results (A-D) show means  $\pm$  s.e.m.,  $n = 3$ . (E) Target of the inhibitor used.

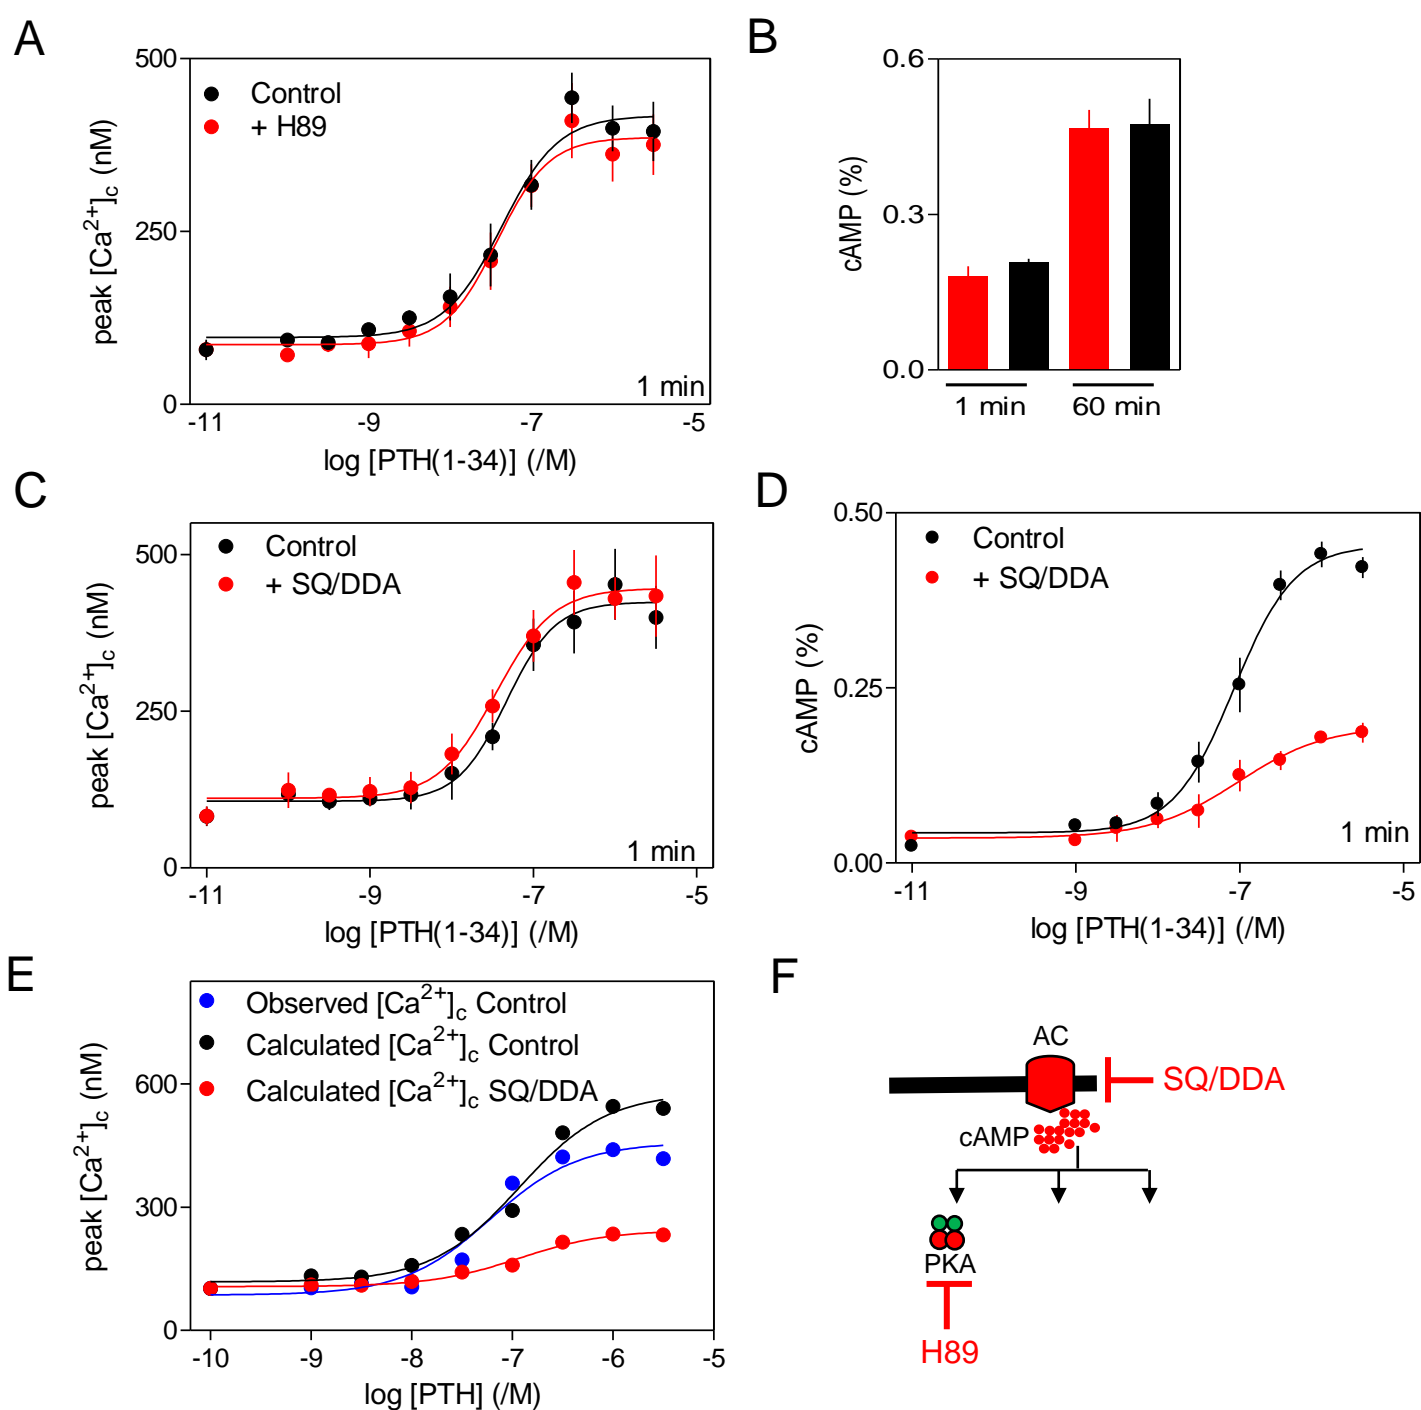

**Fig. S3. Potentiation of carbachol-evoked  $Ca^{2+}$  signals by brief treatment with PTH(1-34) is unaffected by inhibition of protein kinase A or adenylyl cyclase.** (A, C) Cells were incubated with H89 (A, 10  $\mu$ M, 20 min, to inhibit PKA) or SQ22536 (1 mM) and DDA (200  $\mu$ M) (C, SQ/DDA, 20 min, to inhibit AC) before addition of PTH(1-34) for 1 min and then carbachol (20  $\mu$ M) in  $Ca^{2+}$ -free HBS. Results show the peak increase in  $[Ca^{2+}]_c$  evoked by carbachol. (B, D) Effects of the same treatments on the increase in intracellular levels of cAMP (as percentages of  $^3H$ -ATP,  $^3H$ -ADP and  $^3H$ -cAMP) evoked by PTH(1-34) (3  $\mu$ M) for 1 min or 60 min (B) or by the indicated concentrations of PTH(1-34) for 1 min (D). Results (A-D) are means  $\pm$  s.e.m. from at least 3 experiments. (E) The effect of inhibiting adenylyl cyclase on  $Ca^{2+}$  signals modulated by globally delivered cAMP would be readily detectable. Panel D demonstrates that SQ/DDA caused a 61% inhibition of the amount of cAMP produced in response to stimulation with PTH(1-34) for 1 min. Similar inhibition by SQ/DDA was observed after stimulation for 60 min (~70%, supplementary material Table S6). Comparison of responses with and without SQ/DDA allows computation of the concentrations of PTH(1-34) needed to stimulate production of equivalent amounts of cAMP with and without SQ/DDA. Assuming (for  $Ca^{2+}$  signals regulated by globally distributed cAMP) that the relationship between cAMP and  $[Ca^{2+}]_c$  is unaffected by inhibition of AC (Fig. 5E, black line), we can predict the effects of SQ/DDA on potentiation of carbachol-evoked  $Ca^{2+}$  signals by PTH(1-34). The analysis has been performed for control cells (black line) and for cells treated with SQ/DDA (red), and compared with the observed control response (blue). The results demonstrate that if the effects of PTH(1-34) were mediated by a global cAMP signal, SQ/DDA would cause an easily resolved inhibition of the potentiated  $Ca^{2+}$  signals. (F) Targets of the inhibitors used.

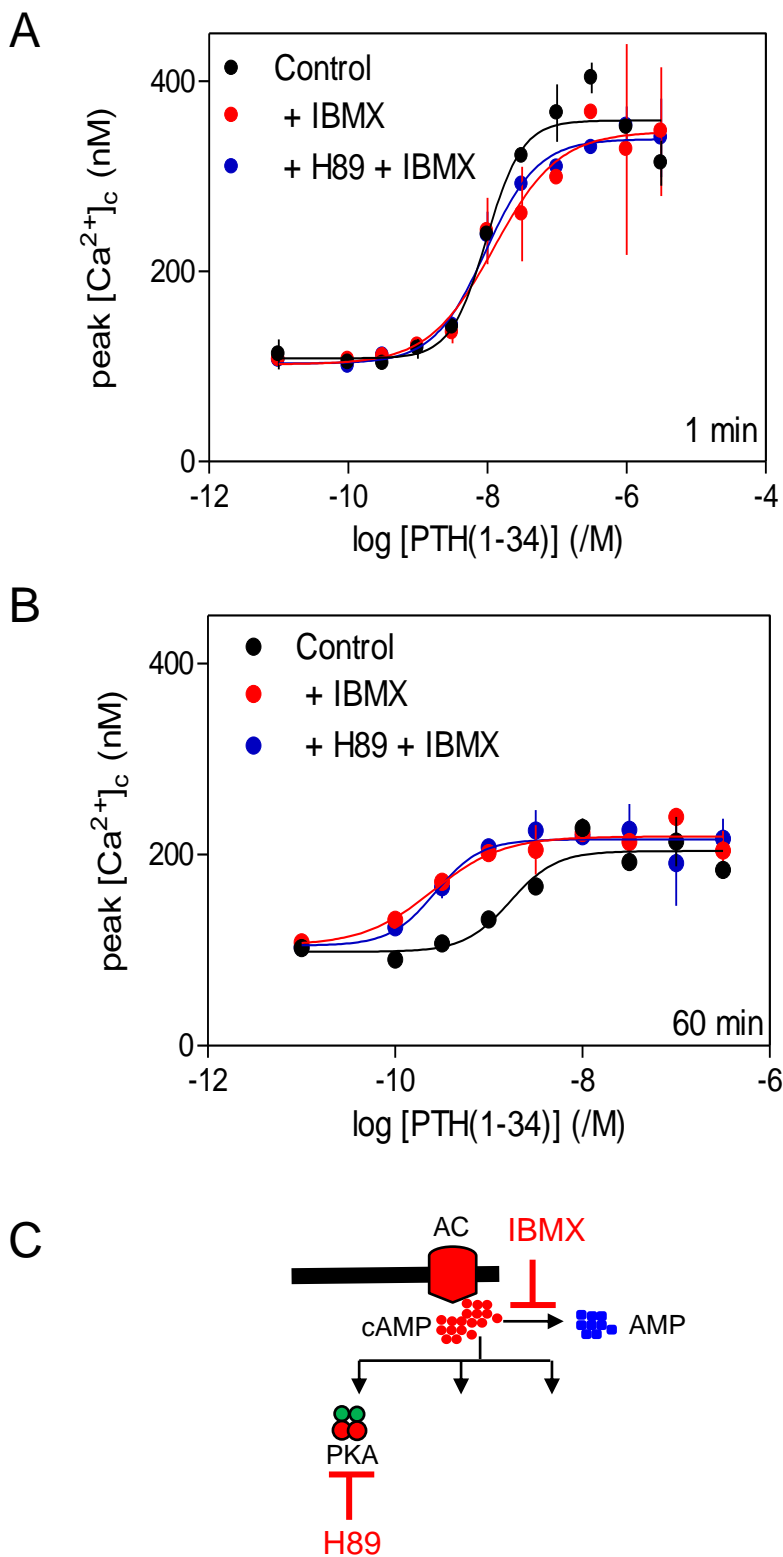

**Fig. S4. Potentiation of carbachol-evoked  $Ca^{2+}$  signals by sustained stimulation with PTH(1-34) in the presence of IBMX is unaffected by inhibition of protein kinase A.** (A, B) Cells were stimulated with PTH(1-34) for 1 min (A) or 60 min (B) before addition of carbachol (20  $\mu$ M) in  $Ca^{2+}$ -free HBS. Cells were pretreated with IBMX (1 mM, 5 min, to inhibit cyclic nucleotide phosphodiesterases) alone or with H89 (10  $\mu$ M, 20 min, to inhibit PKA) as indicated. Results (means  $\pm$  s.e.m.,  $n = 3$ ) show the peak increase in  $[Ca^{2+}]_c$  evoked by carbachol. (C) Targets of the inhibitors used.

Table S1. **Properties of the PTH analogues used.**

|                            |                                       |                              |                                                                |                                                                                                                 |
|----------------------------|---------------------------------------|------------------------------|----------------------------------------------------------------|-----------------------------------------------------------------------------------------------------------------|
| PTH(1-34)                  | SVSEIQLMHNLGKHLNSMERVEWLRKKLQDVHNF    |                              |                                                                |                                                                                                                 |
| PTH(2-38)                  | VSEIQLMHNLGKHLNSMERVEWLRKKLQDVHNFVALG |                              |                                                                |                                                                                                                 |
| Tyr <sup>1</sup> PTH(1-34) | YVSEIQLMHNLGKHLNSMERVEWLRKKLQDVHNF    |                              |                                                                |                                                                                                                 |
| PTHrP(1-36)                | AVSEHQLLHDKGKSIQDLRRRFFLHHLIAEIHTAQI  |                              |                                                                |                                                                                                                 |
| PTHrP(1-34)                | AVSEHQLLHDKGKSIQDLRRRFFLHHLIAEIHTA    |                              |                                                                |                                                                                                                 |
| PTH(1-31)                  | SVSEIQLMHNLGKHLNSMERVEWLRKKLQDV       |                              |                                                                |                                                                                                                 |
|                            | Gs<br>(AC)                            | Gq<br>(PLC)                  | Signalling<br>to AC from<br>internalized<br>PTH <sub>1</sub> R | References                                                                                                      |
| PTH(1-34)                  | Full<br>agonist                       | Full<br>agonist              | Yes                                                            | Bisello et al., 2002; Castro et al., 2002; Cupp et al., 2013; Ferrandon et al., 2009; van der Lee et al., 2013. |
| PTHrP(1-36)<br>PTHrP(1-34) | Full<br>agonist                       | Full<br>agonist              | No <sup>1</sup>                                                | Bisello et al., 2002; Cupp et al., 2013; Dean et al., 2008; Ferrandon et al., 2009.                             |
| PTH(2-38)                  | Full<br>agonist                       | Almost<br>Inactive           | No                                                             | Cupp et al., 2013.                                                                                              |
| PTH(1-31)                  | Full<br>agonist                       | Strong<br>partial<br>agonist | Yes                                                            | Cupp et al., 2013; Takasu et al., 1999.                                                                         |
| PTH(3-34) <sup>2</sup>     | Very weak<br>partial<br>agonist       | Inactive                     | No                                                             | Takasu et al., 1999; Cupp et al., 2013; van der Lee et al., 2013.                                               |
| Tyr <sup>1</sup> PTH(1-34) | Full<br>agonist                       | Almost<br>Inactive           | Weak <sup>3</sup>                                              | Cupp et al., 2013.                                                                                              |

Sequences of the peptides used in this study are shown in the top panel using single-letter amino acid codes. The lower panel summarizes relevant properties of the PTH analogues.

<sup>1</sup>PTHrP(1-36) evokes internalization of PTH<sub>1</sub>R, but not of functional AC signalling complexes. <sup>2</sup>Not used in this study, but included for comparison with earlier work (Tovey et al., 2008). <sup>3</sup>Tyr<sup>1</sup>PTH(1-34) is a weak partial agonist for receptor internalization; it is not known whether internalized AC signalling complexes accompany receptor internalization.

**Table S2. Potentiation of carbachol-evoked Ca<sup>2+</sup> signals by PTH(1-34).**

|        | Carbachol<br>20 $\mu$ M                       |                           | Carbachol<br>1 mM                             |                           |
|--------|-----------------------------------------------|---------------------------|-----------------------------------------------|---------------------------|
|        | Maximal<br>$\Delta[\text{Ca}^{2+}]_c$<br>(nM) | pEC <sub>50</sub><br>(/M) | Maximal<br>$\Delta[\text{Ca}^{2+}]_c$<br>(nM) | pEC <sub>50</sub><br>(/M) |
| 1 min  | 230 $\pm$ 10                                  | 7.5 $\pm$ 0.2             | 234 $\pm$ 29                                  | 7.8 $\pm$ 0.1             |
| 5 min  | 179 $\pm$ 37                                  | 7.1 $\pm$ 0.1             | 228 $\pm$ 9                                   | 7.6 $\pm$ 0.1             |
| 15 min | 94 $\pm$ 7*                                   | 7.9 $\pm$ 0.1*            | 120 $\pm$ 7*                                  | 8.7 $\pm$ 0.1*            |
| 30 min | 142 $\pm$ 38*                                 | 8.8 $\pm$ 0.1*            | 105 $\pm$ 30*                                 | 8.8 $\pm$ 0.1*            |
| 60 min | 108 $\pm$ 7*                                  | 8.1 $\pm$ 0.2*            | 110 $\pm$ 16*                                 | 8.2 $\pm$ 0.2*            |

Experiments similar to those shown in Fig. 1B were used to establish the concentration-dependent effects of PTH(1-34) added for the indicated times before carbachol (20  $\mu$ M or 1 mM) on carbachol-evoked Ca<sup>2+</sup> signals. The EC<sub>50</sub> (half-maximally effective concentration) for responses to carbachol alone was 32  $\mu$ M, pEC<sub>50</sub> = 4.5  $\pm$  0.5 (where pEC<sub>50</sub> = -logEC<sub>50</sub>). Maximal  $\Delta[\text{Ca}^{2+}]_c$  describes the difference between the peak Ca<sup>2+</sup> signal evoked by carbachol alone and that evoked by carbachol in the presence of a maximally effective concentration of PTH(1-34). Results show means  $\pm$  s.e.m., n = 4. \**P* < 0.05 relative to paired comparisons at 1 min.

**Table S3. Stimulation of cAMP accumulation and potentiation of carbachol-evoked Ca<sup>2+</sup> signals by analogues of PTH.**

|                            | 1 min                                 |                                                      |                           |                        | 30 min                                             |                                                      |                                                    |                        |
|----------------------------|---------------------------------------|------------------------------------------------------|---------------------------|------------------------|----------------------------------------------------|------------------------------------------------------|----------------------------------------------------|------------------------|
|                            | peak [Ca <sup>2+</sup> ] <sub>c</sub> |                                                      | cAMP                      |                        | peak [Ca <sup>2+</sup> ] <sub>c</sub>              |                                                      | cAMP                                               |                        |
|                            | pEC <sub>50</sub><br>(/M)             | Maximal<br>Δ[Ca <sup>2+</sup> ] <sub>c</sub><br>(nM) | pEC <sub>50</sub><br>(/M) | Maximal<br>cAMP<br>(%) | pEC <sub>50</sub><br>(/M)<br>[ΔpEC <sub>50</sub> ] | Maximal<br>Δ[Ca <sup>2+</sup> ] <sub>c</sub><br>(nM) | pEC <sub>50</sub><br>(/M)<br>[ΔpEC <sub>50</sub> ] | Maximal<br>cAMP<br>(%) |
| PTH(1-34)                  | 7.7 ± 0.1                             | 205 ± 13                                             | 7.0 ± 0.1                 | 1.1 ± 0.1              | 8.8 ± 0.2*<br>[1.1 ± 0.3]                          | 105 ± 13*                                            | 7.5 ± 0.1*<br>[0.5 ± 0.2]                          | 1.9 ± 0.03*            |
| Tyr <sup>1</sup> PTH(1-34) | 6.7 ± 0.03                            | 233 ± 10                                             | 6.1 ± 0.2                 | 1.3 ± 0.2              | 7.4 ± 0.1*<br>[0.7 ± 0.1]                          | 148 ± 6*                                             | 6.7 ± 0.2*<br>[0.6 ± 0.4]                          | 2.6 ± 0.1*             |
| PTHrP(1-36)                | 7.6 ± 0.1                             | 281 ± 34                                             | 7.3 ± 0.1                 | 0.2 ± 0.01             | 8.6 ± 0.2*<br>[1.0 ± 0.3]                          | 139 ± 2*                                             | 7.3 ± 0.2<br>[0.0 ± 0.3]                           | 0.3 ± 0.01             |
| PTH(2-38)                  | 6.9 ± 0.1                             | 216 ± 21                                             | 6.5 ± 0.04                | 0.7 ± 0.1              | 7.3 ± 0.1*<br>[0.4 ± 0.2]                          | 115 ± 13*                                            | 7.2 ± 0.2*<br>[0.7 ± 0.2]                          | 1.2 ± 0.1*             |

Cells were stimulated with PTH analogues for 1 or 30 min before measuring intracellular levels of cAMP (as percentages of <sup>3</sup>H-ATP + <sup>3</sup>H-ADP + <sup>3</sup>H-cAMP) and changes in [Ca<sup>2+</sup>]<sub>c</sub> evoked by addition of carbachol (20 μM) in Ca<sup>2+</sup>-free HBS. Results show maximal responses and pEC<sub>50</sub> values as means ± s.e.m., n = 3. Δ[Ca<sup>2+</sup>]<sub>c</sub> is the difference between the peak Ca<sup>2+</sup> signals evoked by carbachol alone or after treatment with the PTH analogue. Numbers in brackets show the difference in pEC<sub>50</sub> value (where pEC<sub>50</sub> = -log EC<sub>50</sub>) from measurements taken after incubation for 1 min or 30 min (ΔpEC<sub>50</sub> = pEC<sub>50</sub><sup>1 min</sup> - pEC<sub>50</sub><sup>30 min</sup>). \*P < 0.05 relative to paired comparisons at 1 min.

**Table S4. Ca<sup>2+</sup> signals evoked by carbachol after acute and sustained increases in intracellular cAMP.**

|        | PTH(1-34)                          |                           | NKH477                             |                           | 8-Br-cAMP                          |                           |
|--------|------------------------------------|---------------------------|------------------------------------|---------------------------|------------------------------------|---------------------------|
|        | $\Delta[\text{Ca}^{2+}]_c$<br>(nM) | pEC <sub>50</sub><br>(/M) | $\Delta[\text{Ca}^{2+}]_c$<br>(nM) | pEC <sub>50</sub><br>(/M) | $\Delta[\text{Ca}^{2+}]_c$<br>(nM) | pEC <sub>50</sub><br>(/M) |
| 1 min  | 243 ± 16                           | 7.5 ± 0.1                 | ND                                 | ND                        | ND                                 | ND                        |
| 2 min  | ND                                 | ND                        | 257 ± 3                            | 5.0 ± 0.3                 | ND                                 | ND                        |
| 5 min  | ND                                 | ND                        | 225 ± 9                            | 5.0 ± 0.1                 | 207 ± 7                            | 3.5 ± 0.1                 |
| 15 min | ND                                 | ND                        | 155 ± 10 <sup>*</sup>              | 5.0 ± 0.1                 | ND                                 | ND                        |
| 30 min | 127 ± 14 <sup>*</sup>              | 8.7 ± 0.1 <sup>*</sup>    | 124 ± 24 <sup>*</sup>              | 6.0 ± 0.1 <sup>*</sup>    | 113 ± 5 <sup>*</sup>               | 3.7 ± 0.1                 |

Increases in  $[\text{Ca}^{2+}]_c$  evoked by 20  $\mu\text{M}$  carbachol after incubations for the periods shown with PTH(1-34), NKH477 or 8-Br-cAMP. Results (means ± s.e.m., n = 3) show the maximal potentiated increase in  $[\text{Ca}^{2+}]_c$  ( $\Delta[\text{Ca}^{2+}]_c$ ) after subtraction of the response to carbachol alone (20  $\mu\text{M}$ ) and the sensitivity (pEC<sub>50</sub>) for each stimulus. \*  $P < 0.05$  relative to paired comparisons with the shortest incubation. ND, not determined.

**Table S5. Effects of acute and sustained exposure to cAMP on carbachol-evoked Ca<sup>2+</sup> signals.**

|                                      | Peak $[\text{Ca}^{2+}]_c$<br>(nM) |                       |
|--------------------------------------|-----------------------------------|-----------------------|
|                                      | 1, 2 or 5 min                     | 30 min                |
| Carbachol alone                      | 122 ± 6                           | 113 ± 9               |
| NKH477 then carbachol                | 331 ± 20                          | 256 ± 12 <sup>*</sup> |
| PTH(1-34) then carbachol             | 385 ± 26                          | 268 ± 10 <sup>*</sup> |
| 8-Br-cAMP then carbachol             | 386 ± 21                          | 222 ± 24 <sup>*</sup> |
| 8-Br-cAMP + NKH477 then carbachol    | 355 ± 27                          | 257 ± 22 <sup>*</sup> |
| NKH477 + PTH(1-34) then carbachol    | 356 ± 12                          | 295 ± 25 <sup>*</sup> |
| PTH(1-34) + 8-Br-cAMP then carbachol | 360 ± 28                          | 208 ± 8 <sup>*</sup>  |

Effects of PTH(1-34) (1  $\mu\text{M}$ , 1 or 30 min), NKH477 (200  $\mu\text{M}$ , 2 or 30 min) and 8-Br-cAMP (10  $\mu\text{M}$ , 5 or 30 min) alone or in combination on the peak increases in  $[\text{Ca}^{2+}]_c$  evoked by carbachol (20  $\mu\text{M}$ ). Results are means ± s.e.m., n = 3. \*  $P < 0.05$  relative to paired comparisons with the shortest period of stimulation.



**Table S6. Substantial inhibition of adenylyl cyclase affects neither the acute nor sustained effects of PTH(1-34) on carbachol-evoked Ca<sup>2+</sup> signals.**

|               | 1 min                           |                                               |                           |                                       | 60 min                          |                                               |                           |                                       |
|---------------|---------------------------------|-----------------------------------------------|---------------------------|---------------------------------------|---------------------------------|-----------------------------------------------|---------------------------|---------------------------------------|
|               | peak $\Delta[\text{Ca}^{2+}]_c$ |                                               | cAMP                      |                                       | peak $\Delta[\text{Ca}^{2+}]_c$ |                                               | cAMP                      |                                       |
|               | pEC <sub>50</sub><br>(/M)       | Maximal<br>$\Delta[\text{Ca}^{2+}]_c$<br>(nM) | pEC <sub>50</sub><br>(/M) | Maximal<br>$\Delta\text{cAMP}$<br>(%) | pEC <sub>50</sub><br>(/M)       | Maximal<br>$\Delta[\text{Ca}^{2+}]_c$<br>(nM) | pEC <sub>50</sub><br>(/M) | Maximal<br>$\Delta\text{cAMP}$<br>(%) |
| Control       | 7.4 ± 0.2                       | 364 ± 29                                      | 7.1 ± 0.1                 | 0.40 ± 0.01                           | 8.5 ± 0.20                      | 153 ± 14                                      | 7.5 ± 0.01                | 0.6 ± 0.01                            |
| + SQ/DDA      | 7.5 ± 0.1                       | 341 ± 43                                      | 7.2 ± 0.5                 | 0.16 ± 0.01*                          | 8.9 ± 0.10                      | 193 ± 32                                      | 7.9 ± 0.4                 | 0.18 ± 0.03*                          |
| + IBMX        | 7.7 ± 0.1                       | 300 ± 26                                      | 7.4 ± 0.3                 | 0.80 ± 0.1*                           | 9.6 ± 0.1*                      | 177 ± 18                                      | 7.7 ± 0.1                 | 9.0 ± 0.02*                           |
| + IBMX+SQ/DDA | 7.8 ± 0.1                       | 259 ± 8                                       | ND                        | ND                                    | 9.2 ± 0.05*                     | 178 ± 14                                      | 8.1 ± 0.05*               | 1.9 ± 0.2*                            |

Cells were stimulated with PTH(1-34) for 1 min or 60 min alone or after preincubation with IBMX (1 mM, 5 min) to inhibit cyclic nucleotide phosphodiesterases, or SQ22536 (1 mM) and DDA (200 μM) (SQ/DDA, 20 min) to inhibit adenylyl cyclase. Intracellular levels of cAMP or peak  $\Delta[\text{Ca}^{2+}]_c$  and their sensitivities to PTH(1-34) (pEC<sub>50</sub>) are shown as means ± s.e.m., n = 3. \*P < 0.05 relative to paired time-matched comparisons without inhibitors.

## Supplementary references

- Bisello, A., Chorev, M., Rosenblatt, M., Monticelli, L., Mierke, D. F. and Ferrari, S. L.** (2002). Selective ligand-induced stabilization of active and desensitized parathyroid hormone type 1 receptor conformations. *J. Biol. Chem.* **277**, 38524-38530.
- Castro, M., Dicker, F., Vilardaga, J. P., Krasel, C., Bernhardt, M. and Lohse, M. J.** (2002). Dual regulation of the parathyroid hormone (PTH)/PTH-related peptide receptor signaling by protein kinase C and  $\beta$ -arrestins. *Endocrinology* **143**, 3854-3865.
- Cupp, M. E., Nayak, S. K., Adem, A. S. and Thomsen, W. J.** (2013). Parathyroid hormone (PTH) and PTH-related peptide domains contributing to activation of different PTH receptor-mediated signaling pathways. *J. Pharmacol. Exp. Ther.* **345**, 404-418.
- Dean, T., Vilardaga, J. P., Potts, J. T., Jr. and Gardella, T. J.** (2008). Altered selectivity of parathyroid hormone (PTH) and PTH-related protein (PTHrP) for distinct conformations of the PTH/PTHrP receptor. *Mol. Endocrinol.* **22**, 156-166.
- Ferrandon, S., Feinstein, T. N., Castro, M., Wang, B., Bouley, R., Potts, J. T., Gardella, T. J. and Vilardaga, J. P.** (2009). Sustained cyclic AMP production by parathyroid hormone receptor endocytosis. *Nat. Chem. Biol.* **5**, 734-742.
- Takasu, H., Gardella, T. J., Luck, M. D., Potts, J. T. and Bringham, F. R.** (1999). Amino-terminal modifications of human parathyroid hormone (PTH) selectively alter phospholipase C signaling via the type 1 PTH receptor: Implications for design of signal-specific PTH ligands. *Biochemistry* **38**, 13453-13460.
- Tovey, S. C., Dedos, S. G., Taylor, E. J. A., Church, J. E. and Taylor, C. W.** (2008). Selective coupling of type 6 adenylyl cyclase with type 2 IP<sub>3</sub> receptors mediates a direct sensitization of IP<sub>3</sub> receptors by cAMP. *J. Cell Biol.* **183**, 297-311.
- van der Lee, M. M., Verkaar, F., Wat, J. W., van Offenbeek, J., Timmerman, M., Voorneveld, L., van Lith, L. H. and Zaman, G. J.** (2013).  $\beta$ -Arrestin-biased signaling of PTH analogs of the type 1 parathyroid hormone receptor. *Cell. Signal.* **25**, 527-538.
